# Supplementary material for: Rheological fingerprinting of gastropod pedal mucus and synthetic complex fluids for biomimicking adhesive locomotion
Source: Royal Society of Chemistry journal article supplement (doi:10.1039/b615546d), 2007-01-01
Supplement: b615546d.pdf [file b615546d.pdf]

# ELECTRONIC SUPPLEMENTARY INFORMATION

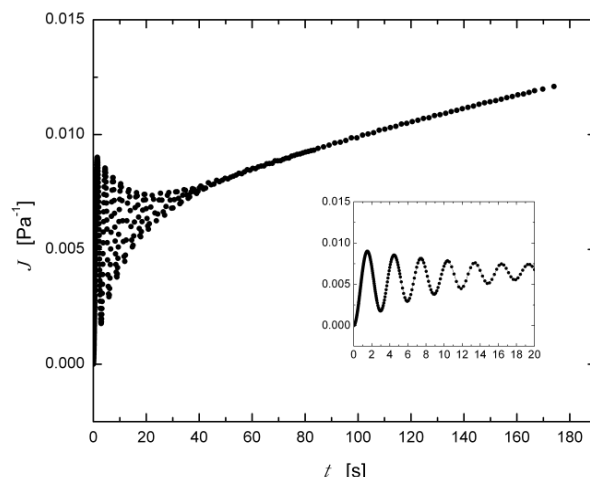

Figure 1. Creep compliance of native pedal mucus from the terrestrial snail *Helix aspera* (AR-G2, D=0.8 cm plate with sandpaper, 1000mm gap, 22°C,  $t_0 = 5 \text{ Pa} < t_y$ ).

Pedal mucus from the garden snail *Helix aspera* was also tested under creep conditions of constant applied stress. Results from one such creep test are shown in Figure 1. Pedal mucus initially shows a dominant elastic response, followed by a small amount of flow as indicated by the slope of the compliance curve. At sufficiently long times the slope of the compliance curve approaches a constant. The rate of change of compliance with time is exactly equal to the inverse of viscosity, that is  $dJ(t)/dt = h^{-1}$ . At steady state  $dJ(t)/dt = 2.96 \times 10^{-5} \text{ Pa}^{-1} \cdot \text{s}^{-1}$ , which corresponds to a viscosity  $h = 3.4 \times 10^4 \text{ Pa} \cdot \text{s}$ . This matches well with the large finite viscosity below the yield stress, as shown in Figure 4 of the paper.

Figure 2 shows the creep response of Carbopol 2% and Laponite 5%. The creep compliance of native slime, from Figure 1, is included for reference. Both simulants also show an initial creep ringing due to the inertia of the instrument in series with the restoring elasticity of the sample.

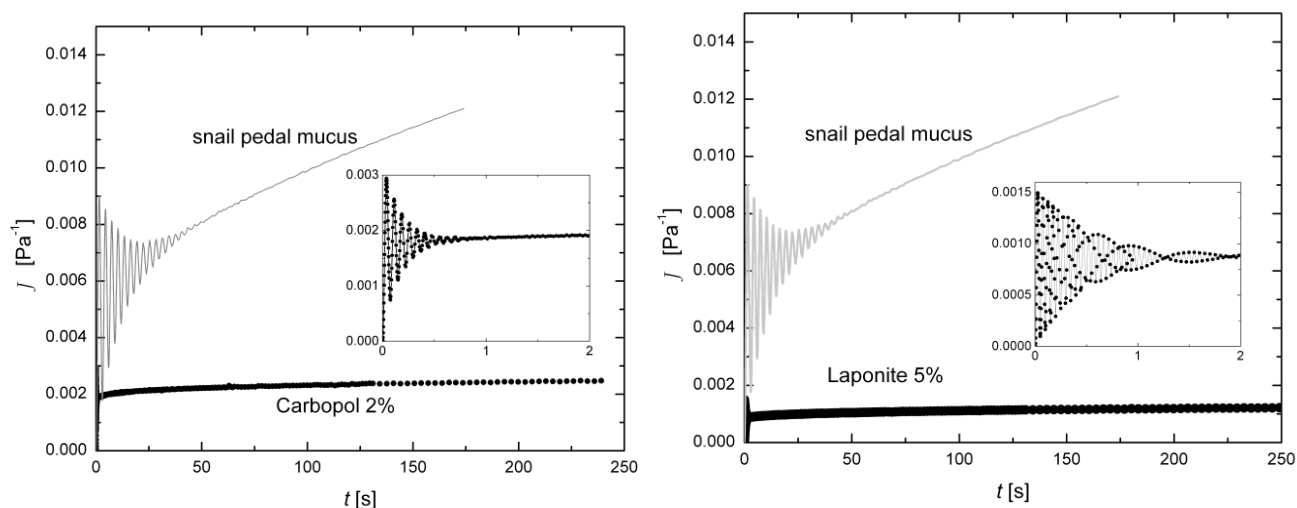

Figure 2. Creep compliance of Carbopol 2.0% ( $t_0 = 5 \text{ Pa} < t_y$ ) and Laponite 5% ( $t_0 = 20 \text{ Pa} < t_y$ ), both with AR1000, 25°C, solvent trap; D=4 cm plate with sandpaper, 1000mm gap; pedal mucus data from Figure 1.

## ELECTRONIC SUPPLEMENTARY INFORMATION

| Legend name  | Description                                                             |
|--------------|-------------------------------------------------------------------------|
| Grease       | Dow Corning high vacuum grease                                          |
| Carbopol     | Carbopol 940 in water, pH7; 0.5%, 1%, 2%, 3%, 4% (w/w)                  |
| Aloe Gel     | Banana Boat, Soothing Aloe After-sun Gel                                |
| Collagen     | Type I collagen in water; 0.5%, 2%, 3.5%, 5% (w/w)                      |
| LBG          | Locust bean gum in Ringer's solution; 1% (w/w)                          |
| Laponite     | LaponiteRD in water, pH=10; 3%, 4%, 5%, 7% (w/w)                        |
| Cream 3      | Westin's Heavenly Bath brand "hydrating cream"                          |
| Conditioner  | Westin's Heavenly Bath brand conditioner                                |
| Toothpaste   | Crest regular paste                                                     |
| Garden snail | Native pedal mucus from the common garden snail ( <i>Helix aspera</i> ) |

Table 1: Details of personal data from Figure 3

### Material details

High vacuum grease was purchased from the Dow Corning Corporation (Midland, MI). Carbopol preparation is described in the article. Aloe gel was purchased under the Banana Boat brand name, labeled as *Soothing Aloe Aftersun Gel*. The aloe gel is distributed by Sun Pharmaceuticals Corp (Delray Beach, FL). Locust bean gum was a gift from P.L. Thomas & Co., Inc. (Morristown, NJ). The collagen mixture was prepared by adding 0.25 g of microfibrillar, type I collagen isolated from bovine tendon (Integra LifeSciences, Plainsboro, NJ) to 4 ml of DI water. After mixing the solution, 1 ml of 3.0M acetic acid was injected, resulting in a mixture of 5% (w/w) collagen in 0.6M acetic acid solution. The collagen and acetic acid solution was mixed using two syringes joined with a female-female Luer-lock assembly, in which the solution was pushed from one syringe to another ten times in succession. The solution was allowed to rest for three hours in order to equilibrate. The mixture was then centrifuged for 45 minutes at 4000g to remove air bubbles. The resulting clear gel was kept at T=4C until it was needed for testing. Locust bean gum was added directly to a Ringer's solution and mixed with a magnetic stirrer. The Ringer's solution is DI water containing 0.86 mg/ml NaCl, 0.03 mg/ml KCl, and 0.033 mg/ml CaCl. Laponite preparation is described in the article. The Cream 3 and Conditioner samples are

| Legend name   | Description                                                                                                                                                         | Reference |
|---------------|---------------------------------------------------------------------------------------------------------------------------------------------------------------------|-----------|
| Banana slug   | Native pedal mucus from the banana slug ( <i>Ariolimax columbianus</i> ); yield stress value from stress overshoot tests, extrapolated to limit of zero strain-rate | [1]       |
| Grease in oil | Dow Corning high vacuum grease in 0.1 Pa.s silicone oil; 15wt%, 25wt%                                                                                               | [2]       |
| Alginate      | Alginate in water; 4.4% (w/w) with Ca cations; $\tau_y$ extrapolated from data                                                                                      | [3]       |
| Carageenan    | Grindsted Carageenan in water; 2%, 3%                                                                                                                               | [4]       |
| Xanthan       | Xanthan in water; 1%, 2%, 3%                                                                                                                                        | [4]       |
| Dextran       | Dextran in water; 250mg/ml; 0mM CaCl <sub>2</sub> , 1.9mM CaCl <sub>2</sub> ;                                                                                       | [5]       |
| HPG3          | hydrophobically modified (hydroxypropyl) guar, called HPG3, in water; 1.5wt%; $\eta \approx 10^2$ Pa.s for $\tau < \tau_y$                                          | [6]       |
| Blend         | Carbopol 940 : sodium alginate : guar gum in artificial tear fluid; 0.5:0.2:0.2, 0.6:0.3:0.3; unknown concentration, fit to Bingham model                           | [7]       |
| Hair gel      | Miss Helen blue hair gel                                                                                                                                            | [8]       |

Table 2: Details of polymeric gels from Figure 3

made available by Westin hotels under the Heavenly Bath brand name. Toothpaste was purchased from a local store, sold by the Crest Co., labeled as *Regular paste - tartar control*. The toothpaste is opaque, and light blue in color. Pedal mucus collection is described in the article.

| Legend name      | Description                                                                                     | Reference |
|------------------|-------------------------------------------------------------------------------------------------|-----------|
| Bentonite        | Ca-bentonite and Na-bentonite in water; 2% (w/w), $\tau_y$ extrapolated from data               | [9]       |
| Cloisite         | Exfoliated montmorillonite clay (Cloisite 20A) in xylene; 1% - 10% (w/w),                       | [10]      |
| Kaolin           | Kaolin (plate-like particles) in water; 51% (w/w)                                               | [11]      |
| TiO <sub>2</sub> | A-HR TiO <sub>2</sub> (sphere-like particles, 0.5 $\mu$ m diameter) in water, pH=2.4; 50% (w/w) | [11]      |

Table 3: Details of particulate gels from Figure 3

| Legend name  | Description                                                                                                                         | Reference |
|--------------|-------------------------------------------------------------------------------------------------------------------------------------|-----------|
| Cream 1      | Commercially available skin creme (brand not reported)                                                                              | [12]      |
| Cream 2      | Prepared lamellar gel-structured “cream” containing emulsifiers, 2% triethanolamine, and water; 6.5% and 13% emulsifiers            | [13]      |
| PB creamy    | Commercially available “smooth” peanut butter (brand not reported), data fit to Bingham model                                       | [14]      |
| PB 100% nuts | Commercially available “100% peanuts” peanut butter (same brand as above, but not reported), data fit to Bingham model              | [14]      |
| Mayo 1       | Factory sample of mayonnaise, fit to Herschel-Bulkley model                                                                         | [13]      |
| Mayo 2a      | Apparent rheology of mayonnaise prepared with various xanthan gum concentrations; 50% (w/w) oil; 0.5%, 1.0%, 1.5% (w/w) xanthan gum | [15]      |
| Mayo 2b      | Same physical sample as Mayo 2a but with data corrected for slip                                                                    | [15]      |
| Mayo 2c      | Slip corrected rheology of mayonnaise prepared with various oil concentrations, no xanthan gum; 75%, 80%, 85% (w/w) oil             | [15]      |
| Foam         | Commercial shaving foam (Gillette Foamy, regular), tested with rough surface, fit to Herschel-Bulkley model                         | [8]       |

Table 4: Details of emulsions, wet foams, and composites from Figure 3

## References

- [1] M. W. Denny and J. M. Gosline. The physical-properties of the pedal mucus of the terrestrial slug, *ariolimax-columbianus*. *Journal of Experimental Biology*, 88(OCT):375–393, 1980.

- [2] S. S. Deshmukh. *Field-responsive ('Smart') fluids for advanced automotive applications*. SM Thesis, Massachusetts Institute of Technology, 2003.
- [3] Z. Y. Wang, Q. Z. Zhang, M. Konno, and S. Saito. Sol-gel transition of alginate solution by the addition of various divalent-cations - a rheological study. *Biopolymers*, 34(6):737–746, 1994.
- [4] M. Marcotte, A. R. T. Hoshahili, and H. S. Ramaswamy. Rheological properties of selected hydrocolloids as a function of concentration and temperature. *Food Research International*, 34(8):695–703, 2001.
- [5] P. A. Padmanabhan, D. S. Kim, D. Pak, and S. J. Sim. Rheology and gelation of water-insoluble dextran from *Leuconostoc mesenteroides* NRRL B-523. *Carbohydrate Polymers*, 53(4):459–468, 2003.
- [6] T. Aubry and M. Moan. Rheological behavior of a hydrophobically associating water-soluble polymer. *Journal of Rheology*, 38(6):1681–1692, 1994.
- [7] T. M. Aminabhavi, S. A. Agnihotri, and B. V. K. Naidu. Rheological properties and drug release characteristics of ph-responsive hydrogels. *Journal of Applied Polymer Science*, 94(5):2057–2064, 2004.
- [8] A. Lindner, P. Coussot, and D. Bonn. Viscous fingering in a yield stress fluid. *Physical Review Letters*, 85(2):314–317, 2000.
- [9] S. Isci, E. Gunister, O. I. Ece, and N. Gungor. The modification of rheologic properties of clays with pva effect. *Materials Letters*, 58(12-13):1975–1978, 2004.
- [10] Y. Zhong and S. Q. Wang. Exfoliation and yield behavior in nanodispersions of organically modified montmorillonite clay. *Journal of Rheology*, 47(2):483–495, 2003.
- [11] P. H. T. Uhlherr, J. Guo, C. Tiu, X. M. Zhang, J. Z. Q. Zhou, and T. N. Fang. The shear-induced solid-liquid transition in yield stress materials with chemically different structures. *Journal of Non-Newtonian Fluid Mechanics*, 125(2-3):101–119, 2005.
- [12] C. Clasen and G. H. McKinley. Gap-dependent microrheometry of complex liquids. *Journal of Non-Newtonian Fluid Mechanics*, 124(1-3):1–10, 2004.
- [13] J. R. Stokes and J. H. Telford. Measuring the yield behaviour of structured fluids. *Journal of Non-Newtonian Fluid Mechanics*, 124(1-3):137–146, 2004.
- [14] G. P. Citerne, P. J. Carreau, and M. Moan. Rheological properties of peanut butter. *Rheologica Acta*, 40(1):86–96, 2001.
- [15] L. Ma and G. V. Barbosacanoas. Rheological characterization of mayonnaise. 2. flow and viscoelastic properties at different oil and xanthan gum concentrations. *Journal of Food Engineering*, 25(3):409–425, 1995.
